# Supplementary material for: Estimating Growth in Height from Limited Longitudinal Growth Data Using Full-Curves Training Dataset: A Comparison of Two Procedures of Curve Optimization—Functional Principal Component Analysis and SITAR
Source: MDPI journal article supplement (doi:10.3390/children8100934), 2021-10-18

Boys APV differences between predictions and reference (FPCA)

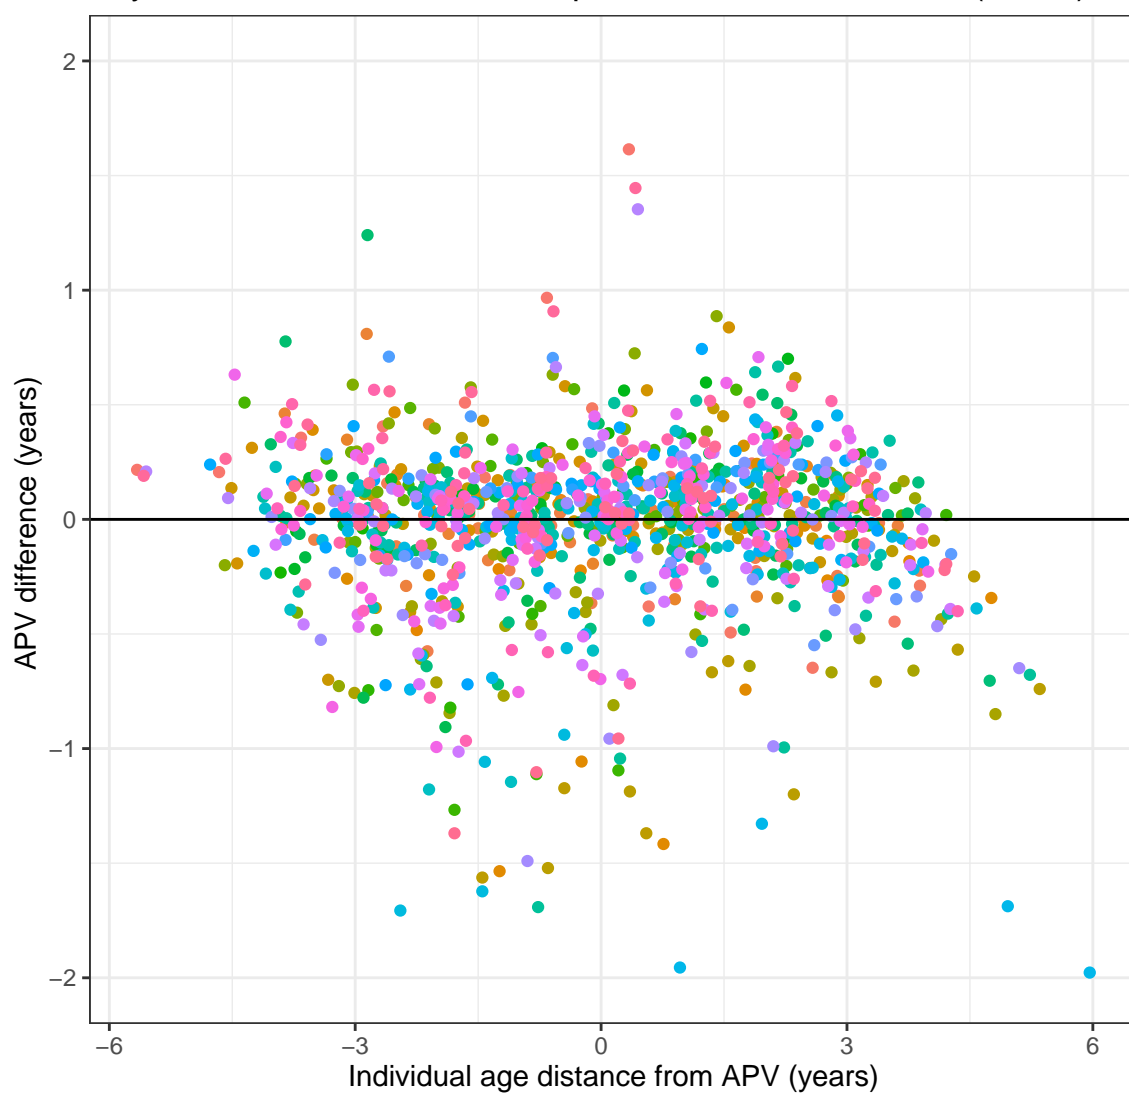

Boys APV differences between predictions and reference (SITAR)

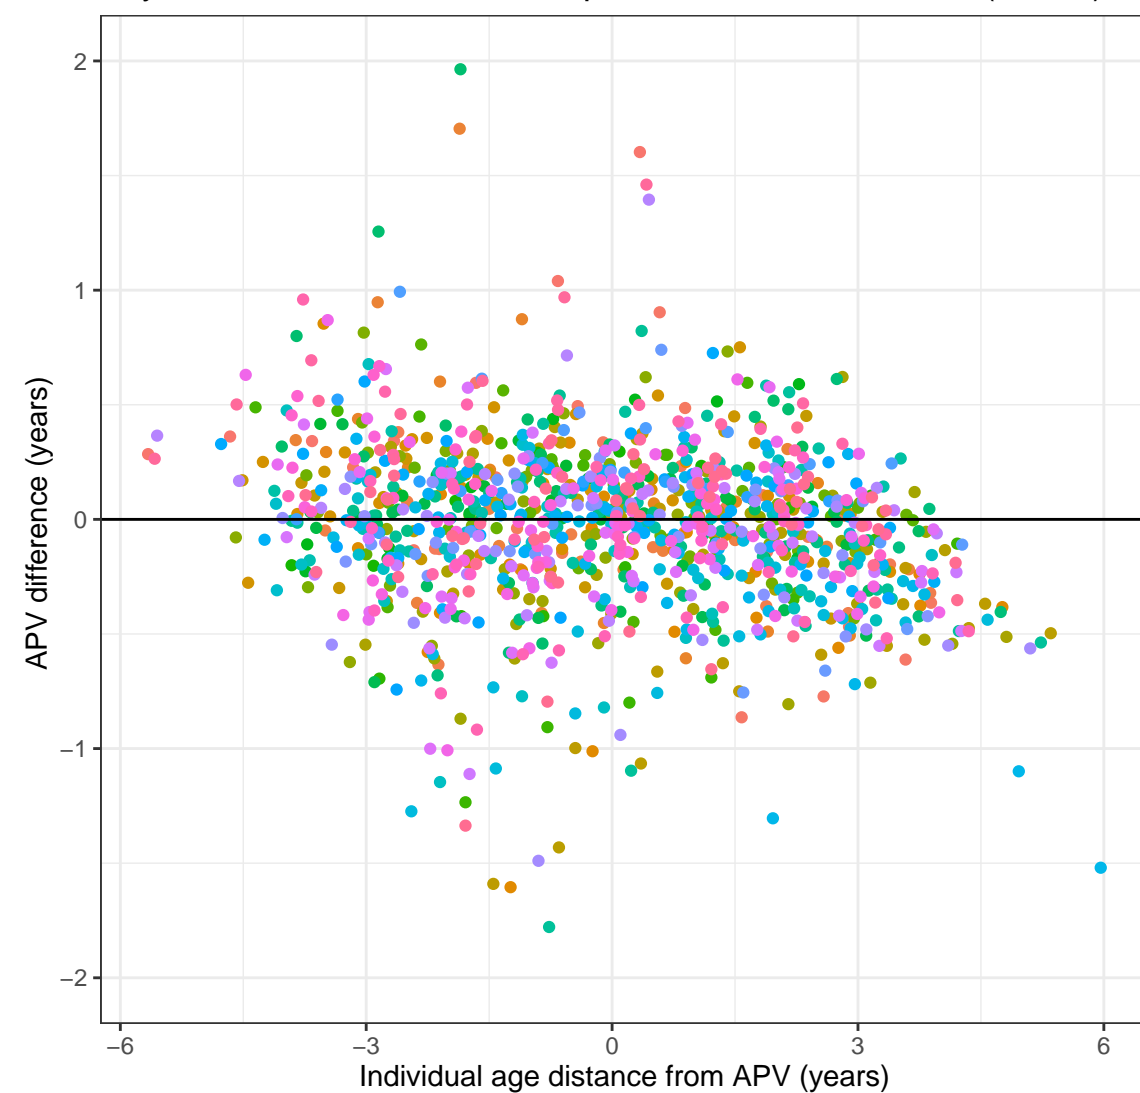

Girls APV differences between predictions and reference (FPCA)

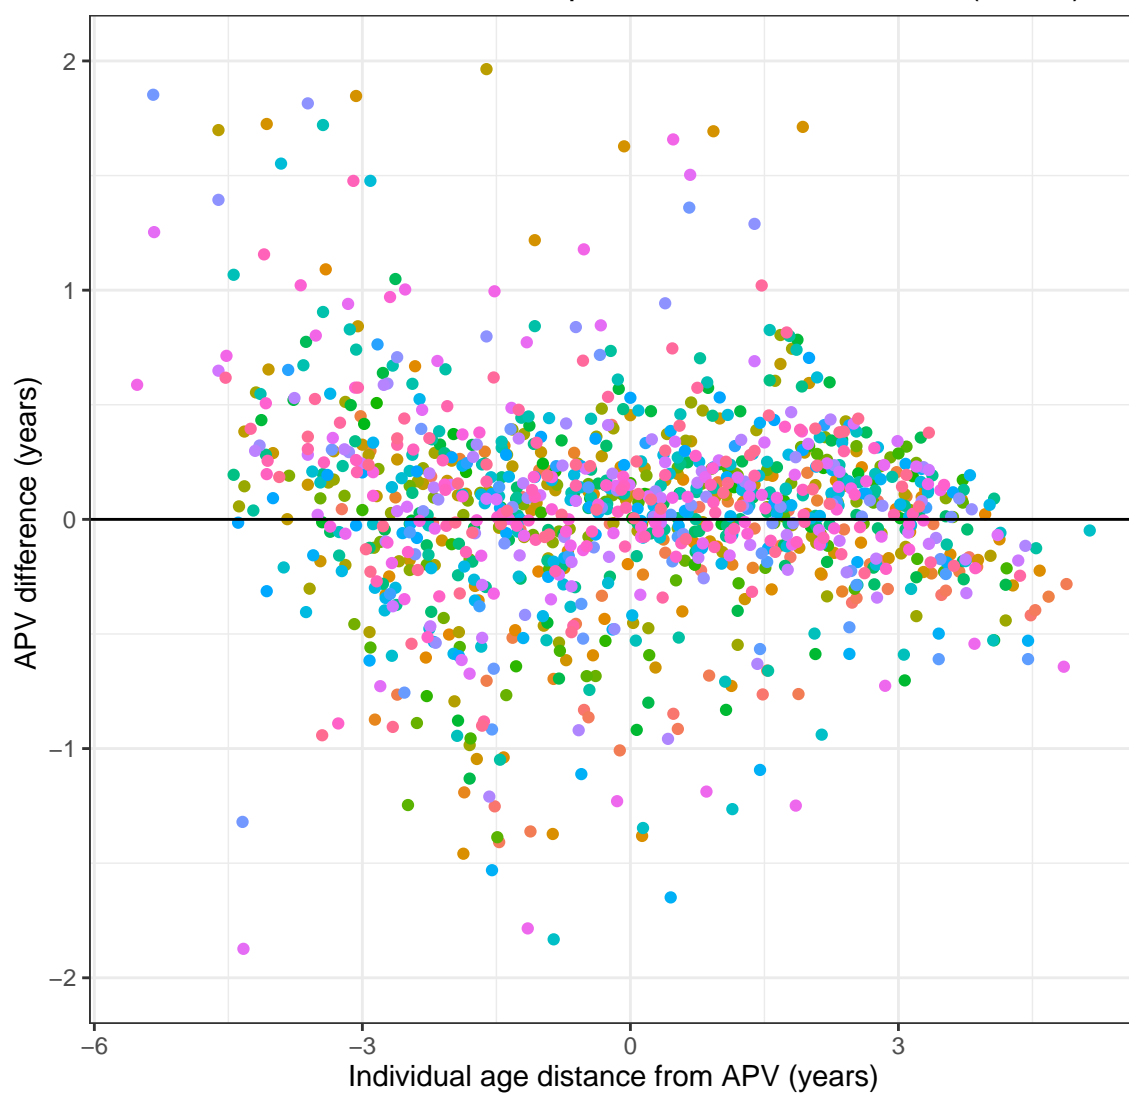

Girls APV differences between predictions and reference (SITAR)

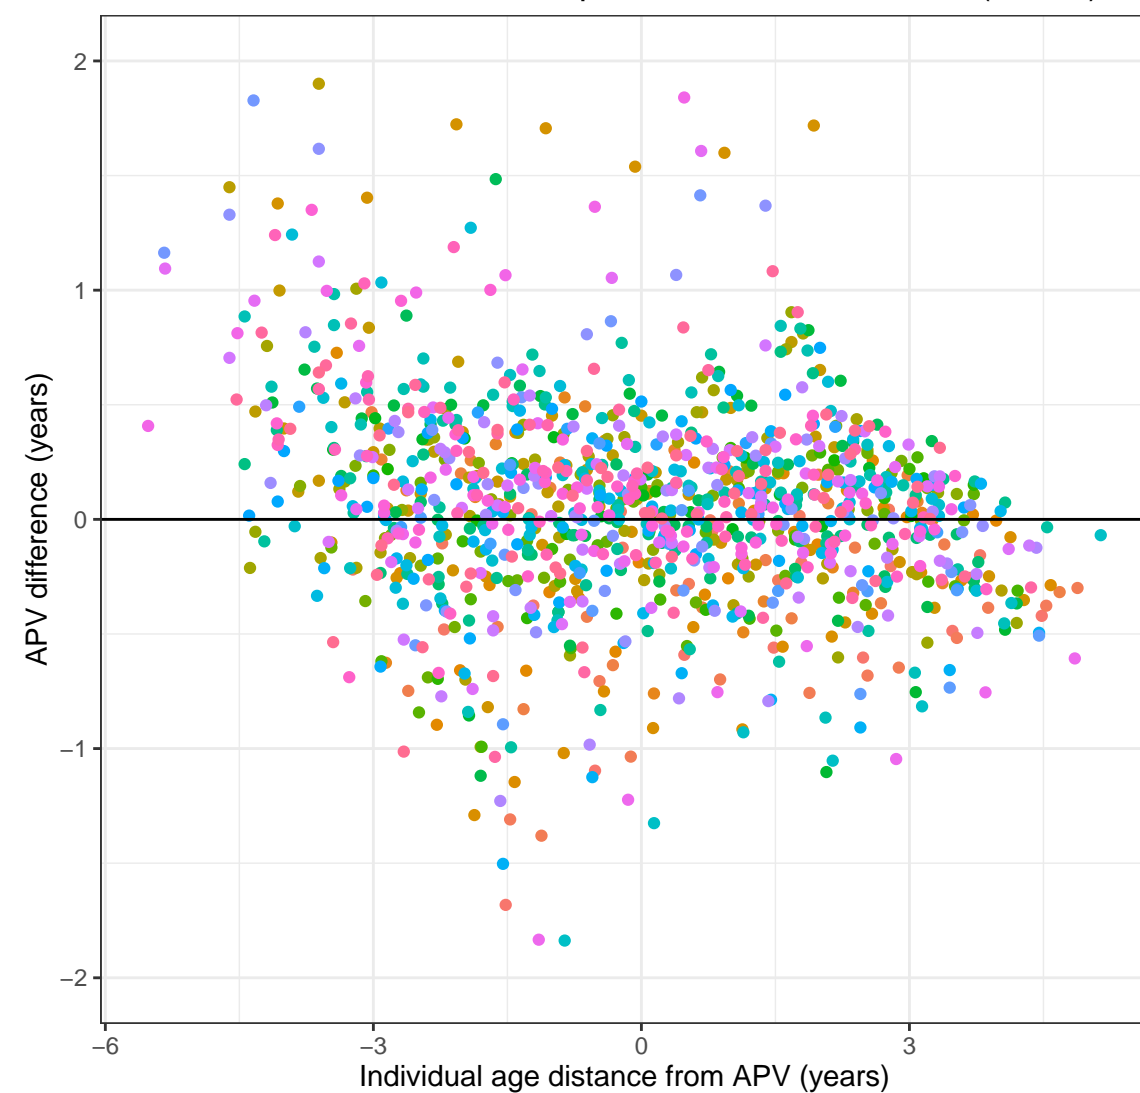

Supplement: s1 [file s1]
