# Supplementary material for: Estimating Growth in Height from Limited Longitudinal Growth Data Using Full-Curves Training Dataset: A Comparison of Two Procedures of Curve Optimization—Functional Principal Component Analysis and SITAR
Source: MDPI journal article supplement (doi:10.3390/children8100934), 2021-10-18
Supplement: s1 [file s1]

## Supplementary Tables

| Boys     |    |                  |     |     |                        |     |                        |         |
|----------|----|------------------|-----|-----|------------------------|-----|------------------------|---------|
|          | N  | Drop-out<br>mean | sd  | N   | Studied sample<br>mean | sd  | Test of the difference |         |
|          |    |                  |     |     |                        |     | W                      | p-value |
| at birth | 51 | 51.1             | 1.6 | 167 | 50.8                   | 2.1 | 4414                   | 0.69    |
| at age 1 | 46 | 76.8             | 2.9 | 163 | 77.1                   | 2.5 | 3446                   | 0.40    |

  

| Girls    |    |                  |     |     |                        |     |                        |         |
|----------|----|------------------|-----|-----|------------------------|-----|------------------------|---------|
|          | N  | Drop-out<br>mean | sd  | N   | Studied sample<br>mean | sd  | Test of the difference |         |
|          |    |                  |     |     |                        |     | W                      | p-value |
| at birth | 60 | 49.5             | 2.1 | 167 | 50.0                   | 2.0 | 4564                   | 0.30    |
| at age 1 | 57 | 74.7             | 2.6 | 162 | 75.4                   | 2.5 | 4040                   | 0.16    |

**Table S1** Test of differences in body length/height between the tested sample and drop-out of the Brno Growth Study, for testing their differences Wilcoxon rank sum test with continuity correction was used.

| variable      | n   | mean  | sd   | median | trimmed | min   | max   | range | skew  | kurtosis |
|---------------|-----|-------|------|--------|---------|-------|-------|-------|-------|----------|
| apv.reference | 167 | 11.61 | 0.9  | 11.7   | 11.61   | 9.09  | 13.75 | 4.66  | -0.18 | -0.31    |
| apv.fpca.s1   | 167 | 11.52 | 0.58 | 11.59  | 11.55   | 9.67  | 12.77 | 3.1   | -0.46 | -0.33    |
| apv.fpca.s2   | 167 | 11.58 | 0.75 | 11.66  | 11.64   | 7.4   | 12.95 | 5.55  | -1.76 | 6.94     |
| apv.fpca.s3   | 167 | 11.59 | 0.7  | 11.63  | 11.61   | 9.57  | 13.31 | 3.74  | -0.21 | -0.14    |
| apv.fpca.s4   | 167 | 11.63 | 0.66 | 11.75  | 11.65   | 9.66  | 13.17 | 3.51  | -0.42 | -0.21    |
| apv.fpca.s5   | 167 | 11.72 | 0.71 | 11.77  | 11.74   | 9.66  | 13.44 | 3.79  | -0.29 | -0.17    |
| apv.fpca.s6   | 167 | 11.73 | 0.7  | 11.81  | 11.74   | 9.98  | 13.69 | 3.71  | -0.09 | -0.39    |
| apv.fpca.s7   | 167 | 11.8  | 0.61 | 11.79  | 11.79   | 10.57 | 13.7  | 3.13  | 0.14  | -0.45    |
| vpv.reference | 167 | 7.57  | 0.88 | 7.54   | 7.57    | 5.19  | 10.8  | 5.62  | 0.2   | 0.74     |
| vpv.fpca.s1   | 167 | 8.02  | 0.59 | 7.96   | 8       | 6.58  | 10.11 | 3.53  | 0.47  | 0.55     |
| vpv.fpca.s2   | 167 | 7.91  | 0.65 | 7.87   | 7.9     | 6.21  | 10.61 | 4.4   | 0.41  | 1.04     |
| vpv.fpca.s3   | 167 | 7.75  | 0.71 | 7.75   | 7.75    | 5.85  | 10.55 | 4.7   | 0.3   | 1.22     |
| vpv.fpca.s4   | 167 | 7.69  | 0.69 | 7.66   | 7.69    | 5.86  | 10.28 | 4.42  | 0.25  | 1.05     |
| vpv.fpca.s5   | 167 | 7.58  | 0.57 | 7.57   | 7.58    | 5.92  | 9.46  | 3.55  | 0.04  | 0.59     |
| vpv.fpca.s6   | 167 | 7.61  | 0.39 | 7.59   | 7.61    | 6.34  | 9.07  | 2.73  | -0.19 | 2.12     |
| vpv.fpca.s7   | 167 | 7.81  | 0.23 | 7.77   | 7.79    | 7.28  | 9.18  | 1.9   | 1.63  | 7.05     |
| ato.reference | 167 | 9.03  | 0.92 | 9.11   | 9.03    | 6.4   | 11.23 | 4.82  | -0.09 | -0.38    |
| ato.fpca.s1   | 167 | 9.26  | 0.47 | 9.37   | 9.31    | 7.31  | 10    | 2.69  | -1.12 | 1.67     |
| ato.fpca.s2   | 167 | 9.42  | 0.51 | 9.46   | 9.45    | 7.22  | 10.37 | 3.14  | -0.99 | 2.53     |
| ato.fpca.s3   | 167 | 9.52  | 0.51 | 9.51   | 9.52    | 7.91  | 10.79 | 2.88  | -0.19 | 0.54     |
| ato.fpca.s4   | 167 | 9.51  | 0.48 | 9.58   | 9.54    | 7.92  | 10.69 | 2.77  | -0.51 | 0.08     |
| ato.fpca.s5   | 167 | 9.59  | 0.49 | 9.59   | 9.59    | 8.12  | 10.68 | 2.56  | -0.13 | -0.18    |
| ato.fpca.s6   | 167 | 9.61  | 0.49 | 9.63   | 9.61    | 8.33  | 10.89 | 2.56  | 0.05  | -0.22    |
| ato.fpca.s7   | 167 | 9.62  | 0.41 | 9.65   | 9.61    | 8.77  | 10.9  | 2.13  | 0.23  | -0.13    |
| vto.reference | 167 | 5.19  | 0.67 | 5.06   | 5.17    | 3.26  | 7.23  | 3.97  | 0.35  | 0.32     |
| vto.fpca.s1   | 167 | 5.36  | 0.54 | 5.27   | 5.32    | 4.09  | 7.87  | 3.78  | 1.04  | 2.44     |
| vto.fpca.s2   | 167 | 5.39  | 0.71 | 5.27   | 5.33    | 3.92  | 8.48  | 4.56  | 1.28  | 3.21     |
| vto.fpca.s3   | 167 | 5.36  | 0.67 | 5.25   | 5.33    | 3.9   | 7.39  | 3.49  | 0.5   | 0.25     |
| vto.fpca.s4   | 167 | 5.26  | 0.58 | 5.24   | 5.24    | 3.83  | 6.92  | 3.09  | 0.25  | 0.05     |
| vto.fpca.s5   | 167 | 5.17  | 0.45 | 5.19   | 5.16    | 3.95  | 6.55  | 2.6   | 0.1   | -0.15    |
| vto.fpca.s6   | 167 | 5.2   | 0.38 | 5.19   | 5.2     | 4.25  | 6.21  | 1.96  | 0.1   | -0.42    |
| vto.fpca.s7   | 167 | 5.22  | 0.34 | 5.25   | 5.22    | 4.38  | 6.02  | 1.64  | 0.07  | -0.38    |

**Table S2** Girls: Descriptive statistics of the reference values of all milestones and their estimates by FPCA method for each testing sample (s1–s7) separately.

| variable      | n   | mean  | sd   | median | trimmed | min   | max   | range | skew  | kurtosis |
|---------------|-----|-------|------|--------|---------|-------|-------|-------|-------|----------|
| apv.reference | 167 | 13.61 | 0.91 | 13.62  | 13.59   | 10.95 | 16.57 | 5.62  | 0.09  | 0.76     |
| apv.fpca.s1   | 167 | 13.41 | 0.68 | 13.5   | 13.44   | 11.16 | 14.76 | 3.6   | -0.62 | 0.47     |
| apv.fpca.s2   | 167 | 13.5  | 0.75 | 13.55  | 13.51   | 11.15 | 15.09 | 3.95  | -0.36 | 0.16     |
| apv.fpca.s3   | 167 | 13.53 | 0.75 | 13.55  | 13.51   | 11.19 | 15.48 | 4.29  | 0.05  | 0.77     |
| apv.fpca.s4   | 167 | 13.58 | 0.68 | 13.65  | 13.6    | 11.19 | 14.87 | 3.68  | -0.52 | 0.52     |
| apv.fpca.s5   | 167 | 13.66 | 0.72 | 13.69  | 13.67   | 11.24 | 15.42 | 4.18  | -0.3  | 0.54     |
| apv.fpca.s6   | 167 | 13.67 | 0.7  | 13.68  | 13.67   | 11.72 | 15.43 | 3.71  | -0.02 | -0.1     |
| apvfpca.s7    | 167 | 13.71 | 0.63 | 13.71  | 13.7    | 12.41 | 15.22 | 2.81  | 0.08  | -0.65    |
| vpv.ref       | 167 | 9.21  | 1.22 | 9.21   | 9.25    | 6.15  | 11.96 | 5.81  | -0.17 | -0.34    |
| vpv.fpca.s1   | 167 | 9.93  | 1.16 | 9.8    | 9.92    | 7.32  | 13.07 | 5.75  | 0.17  | -0.21    |
| vpv.fpca.s2   | 167 | 9.88  | 1.21 | 9.84   | 9.88    | 7.16  | 13.01 | 5.85  | 0.01  | -0.38    |
| vpv.fpca.s3   | 167 | 9.7   | 1.31 | 9.83   | 9.72    | 6.57  | 12.68 | 6.11  | -0.13 | -0.32    |
| vpv.fpca.s4   | 167 | 9.48  | 1.22 | 9.53   | 9.52    | 5.78  | 12.73 | 6.94  | -0.26 | -0.21    |
| vpv.fpca.s5   | 167 | 9.3   | 0.99 | 9.25   | 9.32    | 6.28  | 12.27 | 5.99  | -0.09 | 0.25     |
| vpv.fpca.s6   | 167 | 9.28  | 0.72 | 9.32   | 9.27    | 6.95  | 11.66 | 4.7   | 0.07  | 0.9      |
| vpv.fpca.s7   | 167 | 9.57  | 0.49 | 9.52   | 9.56    | 7.8   | 11.8  | 4     | 0.44  | 2.85     |
| ato.reference | 167 | 10.54 | 0.89 | 10.52  | 10.54   | 7.99  | 13.02 | 5.02  | -0.07 | 0.27     |
| ato.fpca.s1   | 167 | 10.76 | 0.5  | 10.88  | 10.8    | 9.15  | 11.59 | 2.44  | -0.76 | 0.13     |
| ato.fpca.s2   | 167 | 10.86 | 0.58 | 10.9   | 10.88   | 9.16  | 12.18 | 3.01  | -0.35 | -0.16    |
| ato.fpca.s3   | 167 | 10.93 | 0.61 | 10.92  | 10.93   | 9.3   | 12.63 | 3.33  | 0.03  | -0.15    |
| ato.fpca.s4   | 167 | 11.01 | 0.62 | 10.98  | 10.99   | 9.43  | 12.76 | 3.33  | 0.3   | 0.03     |
| ato.fpca.s5   | 167 | 11.09 | 0.63 | 11.01  | 11.06   | 9.38  | 12.84 | 3.45  | 0.41  | 0.32     |
| ato.fpca.s6   | 167 | 11.08 | 0.64 | 11.01  | 11.04   | 9.53  | 13.04 | 3.51  | 0.66  | 0.68     |
| ato.fpca.s7   | 167 | 11.07 | 0.56 | 11.02  | 11.03   | 9.95  | 12.84 | 2.88  | 0.7   | 0.62     |
| vto.reference | 167 | 4.77  | 0.56 | 4.83   | 4.77    | 3.49  | 6.31  | 2.82  | 0.07  | -0.32    |
| vto.fpca.s1   | 167 | 4.92  | 0.47 | 4.87   | 4.9     | 4.01  | 7.04  | 3.03  | 1.02  | 2.86     |
| vto.fpca.s2   | 167 | 4.92  | 0.51 | 4.89   | 4.9     | 3.8   | 6.87  | 3.08  | 0.71  | 1.71     |
| vto.fpca.s3   | 167 | 4.89  | 0.47 | 4.87   | 4.88    | 3.69  | 6.49  | 2.8   | 0.41  | 1.09     |
| vto.fpca.s4   | 167 | 4.82  | 0.43 | 4.8    | 4.82    | 3.55  | 6.4   | 2.85  | 0.17  | 1.82     |
| vto.fpca.s5   | 167 | 4.78  | 0.41 | 4.75   | 4.76    | 3.67  | 6.45  | 2.77  | 0.59  | 2.7      |
| vto.fpca.s6   | 167 | 4.79  | 0.38 | 4.76   | 4.78    | 3.66  | 6.06  | 2.4   | 0.3   | 1.25     |
| vto.fpca.s7   | 167 | 4.8   | 0.32 | 4.77   | 4.79    | 3.97  | 5.66  | 1.69  | 0.24  | 0.1      |

**Table S3** Boys: Descriptive statistics of the reference values of all milestones and their estimates by FPCA method for each testing sample (s1–s7) separately.

| variable      | n   | mean  | sd   | median | trimmed | min   | max   | range | skew  | kurtosis |
|---------------|-----|-------|------|--------|---------|-------|-------|-------|-------|----------|
| apv.reference | 167 | 11.61 | 0.9  | 11.7   | 11.61   | 9.09  | 13.75 | 4.66  | -0.18 | -0.31    |
| apv.sitar.s1  | 167 | 11.54 | 0.55 | 11.64  | 11.59   | 9.49  | 12.66 | 3.17  | -0.81 | 0.43     |
| apv.sitar.s2  | 167 | 11.65 | 0.58 | 11.74  | 11.68   | 9.9   | 12.9  | 3     | -0.49 | -0.24    |
| apv.sitar.s3  | 167 | 11.75 | 0.64 | 11.77  | 11.76   | 10.08 | 13.1  | 3.02  | -0.15 | -0.53    |
| apv.sitar.s4  | 167 | 11.64 | 0.68 | 11.73  | 11.65   | 9.66  | 13.39 | 3.73  | -0.21 | -0.01    |
| apv.sitar.s5  | 167 | 11.64 | 0.64 | 11.76  | 11.67   | 9.8   | 12.93 | 3.13  | -0.4  | -0.37    |
| apv.sitar.s6  | 167 | 11.71 | 0.64 | 11.77  | 11.72   | 10.13 | 13.38 | 3.25  | -0.07 | -0.53    |
| apv.sitar.s7  | 167 | 11.79 | 0.58 | 11.78  | 11.77   | 10.65 | 13.68 | 3.03  | 0.33  | -0.28    |
| vpv.reference | 167 | 7.57  | 0.88 | 7.54   | 7.57    | 5.19  | 10.8  | 5.62  | 0.2   | 0.74     |
| vpv.sitar.s1  | 167 | 7.94  | 0.41 | 7.91   | 7.92    | 7.09  | 9.46  | 2.38  | 0.59  | 0.18     |
| vpv.sitar.s2  | 167 | 7.88  | 0.41 | 7.85   | 7.86    | 6.98  | 9.23  | 2.25  | 0.5   | -0.05    |
| vpv.sitar.s3  | 167 | 7.81  | 0.44 | 7.78   | 7.79    | 6.85  | 9.12  | 2.26  | 0.34  | -0.45    |
| vpv.sitar.s4  | 167 | 7.8   | 0.46 | 7.77   | 7.78    | 6.76  | 9.07  | 2.31  | 0.25  | -0.36    |
| vpv.sitar.s5  | 167 | 7.77  | 0.43 | 7.73   | 7.75    | 6.74  | 8.99  | 2.25  | 0.33  | -0.4     |
| vpv.sitar.s6  | 167 | 7.73  | 0.42 | 7.69   | 7.72    | 6.69  | 8.77  | 2.09  | 0.1   | -0.57    |
| vpv.sitar.s7  | 167 | 7.68  | 0.38 | 7.68   | 7.69    | 6.72  | 8.46  | 1.74  | -0.2  | -0.55    |
| ato.reference | 167 | 9.03  | 0.92 | 9.11   | 9.03    | 6.4   | 11.23 | 4.82  | -0.09 | -0.38    |
| ato.sitar.s1  | 167 | 9.33  | 0.44 | 9.43   | 9.37    | 7.62  | 10.23 | 2.61  | -0.92 | 0.68     |
| ato.sitar.s2  | 167 | 9.42  | 0.47 | 9.52   | 9.45    | 7.99  | 10.45 | 2.46  | -0.49 | -0.25    |
| ato.sitar.s3  | 167 | 9.53  | 0.53 | 9.57   | 9.54    | 8.16  | 10.65 | 2.49  | -0.15 | -0.5     |
| ato.sitar.s4  | 167 | 9.52  | 0.57 | 9.6    | 9.53    | 7.78  | 10.94 | 3.16  | -0.27 | 0.1      |
| ato.sitar.s5  | 167 | 9.54  | 0.54 | 9.64   | 9.57    | 7.92  | 10.64 | 2.71  | -0.46 | -0.32    |
| ato.sitar.s6  | 167 | 9.6   | 0.54 | 9.66   | 9.61    | 8.2   | 11.03 | 2.83  | -0.11 | -0.49    |
| ato.sitar.s7  | 167 | 9.66  | 0.49 | 9.67   | 9.65    | 8.67  | 11.3  | 2.63  | 0.3   | -0.24    |
| vto.reference | 167 | 5.19  | 0.67 | 5.06   | 5.17    | 3.26  | 7.23  | 3.97  | 0.35  | 0.32     |
| vto.sitar.s1  | 167 | 5.48  | 0.29 | 5.45   | 5.46    | 4.88  | 6.56  | 1.68  | 0.62  | 0.21     |
| vto.sitar.s2  | 167 | 5.43  | 0.29 | 5.41   | 5.41    | 4.8   | 6.39  | 1.58  | 0.51  | -0.06    |
| vto.sitar.s3  | 167 | 5.39  | 0.31 | 5.37   | 5.37    | 4.71  | 6.31  | 1.59  | 0.35  | -0.45    |
| vto.sitar.s4  | 167 | 5.41  | 0.32 | 5.39   | 5.4     | 4.68  | 6.3   | 1.62  | 0.26  | -0.36    |
| vto.sitar.s5  | 167 | 5.4   | 0.31 | 5.36   | 5.38    | 4.67  | 6.25  | 1.57  | 0.34  | -0.4     |
| vto.sitar.s6  | 167 | 5.37  | 0.3  | 5.34   | 5.36    | 4.64  | 6.1   | 1.46  | 0.12  | -0.57    |
| vto.sitar.s7  | 167 | 5.33  | 0.26 | 5.33   | 5.34    | 4.66  | 5.88  | 1.23  | -0.19 | -0.55    |

**Table S4** Girls: Descriptive statistics of the reference values of all milestones and their estimates by SITAR method for each testing sample (s1–s7) separately.

| variable      | n   | mean  | sd   | median | trimmed | min   | max   | range | skew  | kurtosis |
|---------------|-----|-------|------|--------|---------|-------|-------|-------|-------|----------|
| apv.reference | 167 | 13.61 | 0.91 | 13.62  | 13.59   | 10.95 | 16.57 | 5.62  | 0.09  | 0.76     |
| apv.sitar.s1  | 167 | 13.47 | 0.68 | 13.56  | 13.49   | 11.23 | 15.04 | 3.81  | -0.53 | 0.63     |
| apv.sitar.s2  | 167 | 13.55 | 0.73 | 13.59  | 13.57   | 11.22 | 15.24 | 4.02  | -0.35 | 0.31     |
| apv.sitar.s3  | 167 | 13.64 | 0.78 | 13.61  | 13.63   | 11.11 | 15.57 | 4.47  | -0.06 | 0.36     |
| apv.sitar.s4  | 167 | 13.63 | 0.82 | 13.62  | 13.62   | 11.1  | 15.85 | 4.75  | 0.1   | 0.66     |
| apv.sitar.s5  | 167 | 13.57 | 0.77 | 13.56  | 13.56   | 11.25 | 16.04 | 4.79  | 0.16  | 0.82     |
| apv.sitar.s6  | 167 | 13.57 | 0.71 | 13.55  | 13.55   | 11.77 | 15.48 | 3.71  | 0.21  | -0.08    |
| apv.sitar.s7  | 167 | 13.59 | 0.65 | 13.51  | 13.55   | 12.45 | 15.46 | 3.01  | 0.47  | -0.35    |
| vpv.reference | 167 | 9.21  | 1.22 | 9.21   | 9.25    | 6.15  | 11.96 | 5.81  | -0.17 | -0.34    |
| vpv.sitar.s1  | 167 | 9.54  | 0.51 | 9.49   | 9.53    | 8.36  | 11.25 | 2.89  | 0.51  | 0.68     |
| vpv.sitar.s2  | 167 | 9.5   | 0.51 | 9.46   | 9.49    | 8.36  | 11.21 | 2.85  | 0.5   | 0.71     |
| vpv.sitar.s3  | 167 | 9.46  | 0.54 | 9.41   | 9.45    | 8.18  | 11.29 | 3.11  | 0.36  | 0.62     |
| vpv.sitar.s4  | 167 | 9.46  | 0.56 | 9.46   | 9.46    | 8.03  | 11.29 | 3.26  | 0.17  | 0.58     |
| vpv.sitar.s5  | 167 | 9.49  | 0.53 | 9.48   | 9.49    | 7.92  | 11.16 | 3.24  | 0.06  | 0.67     |
| vpv.sitar.s6  | 167 | 9.49  | 0.49 | 9.49   | 9.49    | 8.28  | 10.74 | 2.46  | -0.04 | -0.2     |
| vpv.sitar.s7  | 167 | 9.47  | 0.45 | 9.51   | 9.49    | 8.29  | 10.35 | 2.06  | -0.28 | -0.45    |
| ato.reference | 167 | 10.54 | 0.89 | 10.52  | 10.54   | 7.99  | 13.02 | 5.02  | -0.07 | 0.27     |
| ato.sitar.s1  | 167 | 10.58 | 0.53 | 10.66  | 10.6    | 8.83  | 11.72 | 2.89  | -0.64 | 0.75     |
| ato.sitar.s2  | 167 | 10.66 | 0.57 | 10.67  | 10.68   | 8.75  | 11.96 | 3.21  | -0.41 | 0.32     |
| ato.sitar.s3  | 167 | 10.75 | 0.62 | 10.7   | 10.74   | 8.65  | 12.24 | 3.59  | -0.1  | 0.42     |
| ato.sitar.s4  | 167 | 10.74 | 0.65 | 10.74  | 10.73   | 8.65  | 12.47 | 3.83  | 0.05  | 0.74     |
| ato.sitar.s5  | 167 | 10.69 | 0.61 | 10.69  | 10.69   | 8.77  | 12.61 | 3.84  | 0.1   | 0.82     |
| ato.sitar.s6  | 167 | 10.69 | 0.56 | 10.66  | 10.68   | 9.18  | 12.19 | 3.01  | 0.17  | -0.07    |
| ato.sitar.s7  | 167 | 10.7  | 0.52 | 10.65  | 10.68   | 9.71  | 12.18 | 2.46  | 0.46  | -0.34    |
| vto.reference | 167 | 4.77  | 0.56 | 4.83   | 4.77    | 3.49  | 6.31  | 2.82  | 0.07  | -0.32    |
| vto.sitar.s1  | 167 | 5.08  | 0.28 | 5.05   | 5.07    | 4.44  | 6.03  | 1.59  | 0.56  | 0.81     |
| vto.sitar.s2  | 167 | 5.03  | 0.28 | 5      | 5.02    | 4.38  | 6.02  | 1.63  | 0.53  | 0.85     |
| vto.sitar.s3  | 167 | 4.99  | 0.3  | 4.97   | 4.99    | 4.28  | 6.05  | 1.77  | 0.39  | 0.79     |
| vto.sitar.s4  | 167 | 5     | 0.31 | 4.99   | 4.99    | 4.21  | 6.05  | 1.84  | 0.21  | 0.73     |
| vto.sitar.s5  | 167 | 5.01  | 0.29 | 5      | 5.01    | 4.15  | 5.97  | 1.82  | 0.11  | 0.78     |
| vto.sitar.s6  | 167 | 5.01  | 0.27 | 5.01   | 5.01    | 4.36  | 5.74  | 1.38  | 0     | -0.15    |
| vto.sitar.s7  | 167 | 5     | 0.25 | 5.02   | 5.01    | 4.36  | 5.48  | 1.12  | -0.26 | -0.44    |

**Table S5** Boys: Descriptive statistics of the reference values of all milestones and their estimates by SITAR method for each testing sample (s1–s7) separately.

| variable    | n   | mean  | sd   | median | trimmed | min   | max  | range | skew  | kurtosis |
|-------------|-----|-------|------|--------|---------|-------|------|-------|-------|----------|
| apv.fpca.s1 | 167 | -0.09 | 0.66 | -0.06  | -0.09   | -1.83 | 1.85 | 3.68  | 0.14  | 0.57     |
| apv.fpca.s2 | 167 | -0.02 | 0.6  | -0.01  | -0.04   | -1.87 | 2.19 | 4.07  | 0.42  | 1.97     |
| apv.fpca.s3 | 167 | -0.01 | 0.49 | 0.03   | -0.01   | -1.65 | 2.36 | 4.01  | 1.01  | 7.18     |
| apv.fpca.s4 | 167 | 0.02  | 0.35 | 0.05   | 0.03    | -1.25 | 1.96 | 3.21  | 0.45  | 6.99     |
| apv.fpca.s5 | 167 | 0.11  | 0.34 | 0.09   | 0.09    | -0.73 | 2.53 | 3.26  | 2.66  | 16.41    |
| apv.fpca.s6 | 167 | 0.13  | 0.37 | 0.11   | 0.1     | -0.7  | 2.67 | 3.38  | 2.49  | 14.47    |
| apv.fpca.s7 | 167 | 0.19  | 0.43 | 0.14   | 0.15    | -0.64 | 2.6  | 3.24  | 1.85  | 6.88     |
| vpv.fpca.s1 | 167 | 0.45  | 0.84 | 0.42   | 0.44    | -2.03 | 2.56 | 4.59  | 0     | 0.27     |
| vpv.fpca.s2 | 167 | 0.34  | 0.71 | 0.25   | 0.31    | -1.63 | 2.33 | 3.96  | 0.3   | 0.22     |
| vpv.fpca.s3 | 167 | 0.18  | 0.48 | 0.18   | 0.16    | -2    | 1.8  | 3.81  | 0.08  | 3.3      |
| vpv.fpca.s4 | 167 | 0.12  | 0.38 | 0.15   | 0.15    | -1.6  | 0.84 | 2.44  | -1.52 | 4.58     |
| vpv.fpca.s5 | 167 | 0.01  | 0.53 | 0.11   | 0.07    | -2.49 | 0.91 | 3.4   | -1.62 | 3.79     |
| vpv.fpca.s6 | 167 | 0.03  | 0.67 | 0.15   | 0.1     | -3.27 | 1.49 | 4.77  | -1.25 | 3.12     |
| vpv.fpca.s7 | 167 | 0.24  | 0.84 | 0.29   | 0.27    | -3.09 | 2.38 | 5.47  | -0.55 | 0.97     |
| ato.fpca.s1 | 167 | 0.24  | 0.65 | 0.28   | 0.25    | -1.8  | 2.25 | 4.06  | -0.17 | 0.89     |
| ato.fpca.s2 | 167 | 0.4   | 0.61 | 0.29   | 0.37    | -1.25 | 2.25 | 3.51  | 0.46  | 0.49     |
| ato.fpca.s3 | 167 | 0.49  | 0.66 | 0.42   | 0.45    | -1.47 | 2.8  | 4.27  | 0.62  | 0.98     |
| ato.fpca.s4 | 167 | 0.49  | 0.63 | 0.45   | 0.47    | -1.22 | 2.26 | 3.48  | 0.26  | 0.23     |
| ato.fpca.s5 | 167 | 0.56  | 0.62 | 0.49   | 0.54    | -0.89 | 2.5  | 3.39  | 0.42  | 0.21     |
| ato.fpca.s6 | 167 | 0.59  | 0.65 | 0.54   | 0.56    | -0.81 | 2.67 | 3.48  | 0.41  | 0.15     |
| ato.fpca.s7 | 167 | 0.6   | 0.7  | 0.55   | 0.58    | -1    | 2.67 | 3.68  | 0.3   | 0.04     |
| vto.fpca.s1 | 167 | 0.17  | 0.28 | 0.16   | 0.17    | -0.46 | 0.88 | 1.34  | 0.08  | -0.5     |
| vto.fpca.s2 | 167 | 0.2   | 0.38 | 0.16   | 0.16    | -0.53 | 2.7  | 3.23  | 2.38  | 11.47    |
| vto.fpca.s3 | 167 | 0.17  | 0.39 | 0.11   | 0.15    | -0.83 | 1.93 | 2.77  | 0.87  | 2.14     |
| vto.fpca.s4 | 167 | 0.07  | 0.47 | 0.07   | 0.07    | -1.21 | 1.48 | 2.7   | -0.02 | 0.16     |
| vto.fpca.s5 | 167 | -0.02 | 0.51 | -0.01  | -0.01   | -1.54 | 1.56 | 3.1   | -0.2  | 0.44     |
| vto.fpca.s6 | 167 | 0.01  | 0.52 | 0.01   | 0.02    | -1.49 | 1.54 | 3.03  | -0.1  | 0.25     |
| vto.fpca.s7 | 167 | 0.03  | 0.55 | 0.05   | 0.04    | -1.57 | 1.56 | 3.13  | -0.13 | 0.23     |

**Table S6** Girls: Descriptive statistics of D values (differences between FPCA estimates and reference values) of all milestones for each testing sample (s1–s7) separately.

| variable    | n   | mean  | sd   | median | trimmed | min   | max  | range | skew  | kurtosis |
|-------------|-----|-------|------|--------|---------|-------|------|-------|-------|----------|
| apv.fpca.s1 | 167 | -0.2  | 0.5  | -0.1   | -0.15   | -2.47 | 0.78 | 3.25  | -1.34 | 2.69     |
| apv.fpca.s2 | 167 | -0.11 | 0.41 | -0.01  | -0.06   | -1.96 | 1.24 | 3.2   | -1.26 | 3.6      |
| apv.fpca.s3 | 167 | -0.08 | 0.32 | 0.01   | -0.03   | -1.42 | 0.7  | 2.12  | -1.73 | 4.23     |
| apv.fpca.s4 | 167 | -0.03 | 0.33 | 0.03   | 0.01    | -2.85 | 0.58 | 3.42  | -4.3  | 30.88    |
| apv.fpca.s5 | 167 | 0.05  | 0.28 | 0.08   | 0.07    | -2.03 | 0.63 | 2.67  | -2.56 | 16.86    |
| apv.fpca.s6 | 167 | 0.06  | 0.3  | 0.09   | 0.08    | -1.69 | 0.97 | 2.65  | -1.09 | 6.17     |
| apv.fpca.s7 | 167 | 0.1   | 0.39 | 0.1    | 0.1     | -1.98 | 1.61 | 3.59  | -0.27 | 6.23     |
| vpv.fpca.s1 | 167 | 0.72  | 1.3  | 0.59   | 0.66    | -3.11 | 5.27 | 8.39  | 0.57  | 1.05     |
| vpv.fpca.s2 | 167 | 0.66  | 1.17 | 0.45   | 0.55    | -3.4  | 5.57 | 8.97  | 1.1   | 3.45     |
| vpv.fpca.s3 | 167 | 0.49  | 0.95 | 0.37   | 0.37    | -1.59 | 6.1  | 7.69  | 2.84  | 12.79    |
| vpv.fpca.s4 | 167 | 0.26  | 0.5  | 0.3    | 0.32    | -2.74 | 1.02 | 3.76  | -2.79 | 12.63    |
| vpv.fpca.s5 | 167 | 0.09  | 0.6  | 0.27   | 0.17    | -2.34 | 1.22 | 3.56  | -1.56 | 2.85     |
| vpv.fpca.s6 | 167 | 0.06  | 0.91 | 0.27   | 0.11    | -2.47 | 2.24 | 4.71  | -0.55 | -0.1     |
| vpv.fpca.s7 | 167 | 0.36  | 1.2  | 0.51   | 0.37    | -2.22 | 3.05 | 5.27  | -0.13 | -0.78    |
| ato.fpca.s1 | 167 | 0.23  | 0.52 | 0.23   | 0.23    | -1.55 | 2.35 | 3.9   | 0.05  | 2.89     |
| ato.fpca.s2 | 167 | 0.33  | 0.49 | 0.27   | 0.3     | -1.13 | 2.41 | 3.54  | 0.82  | 2.46     |
| ato.fpca.s3 | 167 | 0.39  | 0.49 | 0.33   | 0.36    | -0.6  | 2.46 | 3.06  | 0.89  | 1.93     |
| ato.fpca.s4 | 167 | 0.47  | 0.51 | 0.4    | 0.44    | -1.08 | 2.57 | 3.66  | 0.8   | 1.97     |
| ato.fpca.s5 | 167 | 0.55  | 0.53 | 0.48   | 0.51    | -0.5  | 2.65 | 3.15  | 0.88  | 1.15     |
| ato.fpca.s6 | 167 | 0.55  | 0.58 | 0.46   | 0.51    | -0.55 | 2.59 | 3.14  | 0.72  | 0.49     |
| ato.fpca.s7 | 167 | 0.53  | 0.61 | 0.44   | 0.49    | -0.75 | 2.61 | 3.36  | 0.63  | 0.32     |
| vto.fpca.s1 | 167 | 0.15  | 0.3  | 0.12   | 0.13    | -0.55 | 1.6  | 2.15  | 1.1   | 3.54     |
| vto.fpca.s2 | 167 | 0.15  | 0.34 | 0.11   | 0.12    | -0.68 | 1.77 | 2.45  | 1.17  | 3.72     |
| vto.fpca.s3 | 167 | 0.11  | 0.39 | 0.08   | 0.1     | -1    | 1.39 | 2.39  | 0.35  | 0.79     |
| vto.fpca.s4 | 167 | 0.04  | 0.44 | 0.02   | 0.04    | -1.22 | 1.34 | 2.56  | 0.02  | 0.41     |
| vto.fpca.s5 | 167 | 0     | 0.45 | 0      | 0       | -1.28 | 1.38 | 2.66  | -0.02 | 0.32     |
| vto.fpca.s6 | 167 | 0.02  | 0.45 | 0.04   | 0.02    | -1.25 | 1.12 | 2.37  | -0.19 | -0.12    |
| vto.fpca.s7 | 167 | 0.02  | 0.44 | 0.05   | 0.04    | -1.2  | 1.12 | 2.32  | -0.29 | -0.27    |

**Table S7** Boys: Descriptive statistics of D values (differences between FPCA estimates and reference values) of all milestones for each testing sample (s1–s7) separately.

| variable     | n   | mean  | sd   | median | trimmed | min   | max  | range | skew  | kurtosis |
|--------------|-----|-------|------|--------|---------|-------|------|-------|-------|----------|
| apv.sitar.s1 | 167 | -0.06 | 0.64 | -0.05  | -0.05   | -1.84 | 1.45 | 3.29  | -0.19 | 0.2      |
| apv.sitar.s2 | 167 | 0.05  | 0.53 | 0.04   | 0.03    | -1.33 | 1.9  | 3.23  | 0.44  | 1.32     |
| apv.sitar.s3 | 167 | 0.15  | 0.62 | 0.07   | 0.08    | -0.93 | 3.8  | 4.73  | 2.84  | 13       |
| apv.sitar.s4 | 167 | 0.04  | 0.4  | 0.03   | 0.03    | -1.05 | 2.61 | 3.66  | 1.67  | 10.4     |
| apv.sitar.s5 | 167 | 0.04  | 0.4  | 0.05   | 0.03    | -1.1  | 2.19 | 3.29  | 0.86  | 5.71     |
| apv.sitar.s6 | 167 | 0.11  | 0.4  | 0.11   | 0.08    | -0.75 | 2.43 | 3.18  | 1.6   | 7.43     |
| apv.sitar.s7 | 167 | 0.18  | 0.46 | 0.14   | 0.13    | -0.61 | 2.63 | 3.23  | 1.77  | 5.66     |
| vpv.sitar.s1 | 167 | 0.37  | 0.83 | 0.3    | 0.35    | -2.18 | 2.66 | 4.85  | 0.14  | 0.22     |
| vpv.sitar.s2 | 167 | 0.31  | 0.77 | 0.31   | 0.31    | -2.21 | 2.39 | 4.61  | -0.03 | 0.29     |
| vpv.sitar.s3 | 167 | 0.23  | 0.76 | 0.25   | 0.25    | -2.42 | 2.06 | 4.48  | -0.33 | 0.35     |
| vpv.sitar.s4 | 167 | 0.22  | 0.8  | 0.25   | 0.23    | -2.64 | 2.59 | 5.22  | -0.17 | 0.58     |
| vpv.sitar.s5 | 167 | 0.2   | 0.84 | 0.18   | 0.2     | -2.68 | 2.58 | 5.26  | -0.09 | 0.52     |
| vpv.sitar.s6 | 167 | 0.16  | 0.83 | 0.15   | 0.17    | -2.65 | 2.38 | 5.04  | -0.17 | 0.46     |
| vpv.sitar.s7 | 167 | 0.11  | 0.81 | 0.14   | 0.12    | -2.73 | 2.23 | 4.96  | -0.23 | 0.49     |
| ato.sitar.s1 | 167 | 0.3   | 0.76 | 0.31   | 0.32    | -1.9  | 2    | 3.9   | -0.25 | -0.36    |
| ato.sitar.s2 | 167 | 0.4   | 0.64 | 0.38   | 0.39    | -1.59 | 1.99 | 3.58  | 0.01  | 0.05     |
| ato.sitar.s3 | 167 | 0.51  | 0.67 | 0.45   | 0.46    | -1.19 | 3.62 | 4.81  | 1.2   | 3.64     |
| ato.sitar.s4 | 167 | 0.5   | 0.59 | 0.46   | 0.47    | -1.21 | 2.25 | 3.46  | 0.28  | 0.51     |
| ato.sitar.s5 | 167 | 0.51  | 0.65 | 0.51   | 0.51    | -1.3  | 2.39 | 3.69  | 0.07  | 0.43     |
| ato.sitar.s6 | 167 | 0.58  | 0.65 | 0.58   | 0.56    | -1.05 | 2.62 | 3.67  | 0.23  | 0.35     |
| ato.sitar.s7 | 167 | 0.64  | 0.67 | 0.61   | 0.61    | -0.91 | 2.77 | 3.68  | 0.38  | 0.19     |
| vto.sitar.s1 | 167 | 0.29  | 0.45 | 0.33   | 0.29    | -1.1  | 1.64 | 2.74  | -0.03 | 0.34     |
| vto.sitar.s2 | 167 | 0.24  | 0.45 | 0.33   | 0.26    | -1.18 | 1.55 | 2.73  | -0.29 | 0.34     |
| vto.sitar.s3 | 167 | 0.2   | 0.48 | 0.3    | 0.22    | -1.36 | 1.58 | 2.94  | -0.45 | 0.67     |
| vto.sitar.s4 | 167 | 0.22  | 0.48 | 0.28   | 0.24    | -1.31 | 1.62 | 2.92  | -0.34 | 0.61     |
| vto.sitar.s5 | 167 | 0.21  | 0.5  | 0.28   | 0.22    | -1.34 | 1.71 | 3.04  | -0.24 | 0.49     |
| vto.sitar.s6 | 167 | 0.18  | 0.51 | 0.27   | 0.19    | -1.41 | 1.74 | 3.15  | -0.23 | 0.55     |
| vto.sitar.s7 | 167 | 0.15  | 0.53 | 0.22   | 0.16    | -1.55 | 1.76 | 3.31  | -0.28 | 0.61     |

**Table S8** Girls: Descriptive statistics of D values (differences between SITAR estimates and reference values) of all milestones for each testing sample (s1–s7) separately.



| variable     | n   | mean  | sd   | median | trimmed | min   | max  | range | skew  | kurtosis |
|--------------|-----|-------|------|--------|---------|-------|------|-------|-------|----------|
| apv.sitar.s1 | 167 | -0.14 | 0.54 | -0.08  | -0.09   | -2.54 | 0.99 | 3.53  | -1.09 | 2.37     |
| apv.sitar.s2 | 167 | -0.05 | 0.4  | -0.02  | -0.04   | -2.02 | 1.26 | 3.27  | -0.72 | 3.65     |
| apv.sitar.s3 | 167 | 0.03  | 0.37 | 0.06   | 0.03    | -1.3  | 1.96 | 3.27  | 0.88  | 6.7      |
| apv.sitar.s4 | 167 | 0.02  | 0.29 | 0.04   | 0.03    | -0.76 | 0.9  | 1.66  | -0.22 | 0.58     |
| apv.sitar.s5 | 167 | -0.04 | 0.38 | 0      | -0.01   | -3.21 | 0.62 | 3.83  | -3.59 | 27.49    |
| apv.sitar.s6 | 167 | -0.04 | 0.3  | -0.02  | -0.04   | -1.1  | 1.04 | 2.14  | 0.12  | 1.48     |
| apv.sitar.s7 | 167 | -0.02 | 0.37 | -0.05  | -0.04   | -1.52 | 1.6  | 3.12  | 0.9   | 4.33     |
| vpv.sitar.s1 | 167 | 0.33  | 1.14 | 0.38   | 0.3     | -2.47 | 3.57 | 6.03  | 0.23  | -0.35    |
| vpv.sitar.s2 | 167 | 0.29  | 1.04 | 0.34   | 0.26    | -2.28 | 3.22 | 5.5   | 0.24  | -0.28    |
| vpv.sitar.s3 | 167 | 0.24  | 1.01 | 0.24   | 0.22    | -2.35 | 2.78 | 5.14  | 0.16  | -0.46    |
| vpv.sitar.s4 | 167 | 0.25  | 1.1  | 0.19   | 0.21    | -2.51 | 4.11 | 6.61  | 0.44  | 0.48     |
| vpv.sitar.s5 | 167 | 0.28  | 1.16 | 0.24   | 0.22    | -2.57 | 3.92 | 6.49  | 0.43  | 0.17     |
| vpv.sitar.s6 | 167 | 0.28  | 1.13 | 0.23   | 0.23    | -2.49 | 3.65 | 6.15  | 0.33  | -0.06    |
| vpv.sitar.s7 | 167 | 0.26  | 1.11 | 0.26   | 0.22    | -2.3  | 3.48 | 5.79  | 0.31  | -0.22    |
| ato.sitar.s1 | 167 | 0.04  | 0.64 | 0.06   | 0.05    | -2.04 | 2.16 | 4.2   | -0.15 | 1.21     |
| ato.sitar.s2 | 167 | 0.13  | 0.53 | 0.09   | 0.12    | -1.59 | 2.21 | 3.8   | 0.26  | 1.79     |
| ato.sitar.s3 | 167 | 0.21  | 0.51 | 0.13   | 0.19    | -1.01 | 2.21 | 3.22  | 0.67  | 1.37     |
| ato.sitar.s4 | 167 | 0.21  | 0.55 | 0.17   | 0.18    | -1.47 | 2.19 | 3.67  | 0.57  | 1.11     |
| ato.sitar.s5 | 167 | 0.16  | 0.63 | 0.15   | 0.13    | -2.57 | 2.17 | 4.74  | 0.06  | 2.12     |
| ato.sitar.s6 | 167 | 0.15  | 0.6  | 0.11   | 0.12    | -1.17 | 2.21 | 3.38  | 0.61  | 0.6      |
| ato.sitar.s7 | 167 | 0.17  | 0.62 | 0.09   | 0.13    | -1.21 | 2.25 | 3.46  | 0.63  | 0.46     |
| vto.sitar.s1 | 167 | 0.3   | 0.42 | 0.27   | 0.31    | -0.94 | 1.19 | 2.13  | -0.17 | -0.36    |
| vto.sitar.s2 | 167 | 0.25  | 0.43 | 0.24   | 0.26    | -0.99 | 1.14 | 2.13  | -0.22 | -0.25    |
| vto.sitar.s3 | 167 | 0.22  | 0.44 | 0.21   | 0.23    | -1.12 | 1.15 | 2.27  | -0.26 | -0.07    |
| vto.sitar.s4 | 167 | 0.22  | 0.45 | 0.24   | 0.23    | -1.15 | 1.41 | 2.56  | -0.1  | -0.21    |
| vto.sitar.s5 | 167 | 0.24  | 0.46 | 0.29   | 0.25    | -1.14 | 1.44 | 2.58  | -0.17 | -0.29    |
| vto.sitar.s6 | 167 | 0.24  | 0.46 | 0.26   | 0.25    | -1.11 | 1.4  | 2.51  | -0.19 | -0.3     |
| vto.sitar.s7 | 167 | 0.23  | 0.46 | 0.26   | 0.24    | -1.05 | 1.4  | 2.45  | -0.2  | -0.23    |

**Table S9** Boys: Descriptive statistics of D values (differences between SITAR estimates and reference values) of all milestones for each testing sample (s1–s7) separately.

**Table S10** Results of four Mixed Effects Linear Models analysis of differences (D) between estimates of growth milestones (APV, VPV, ATO, VTO) and their reference values.

The mixed-effects linear models were computed using the Maximum Likelihood estimator (ML) in the R-package *lme4* (Bates et al., 2015). Computation of p-values was based on conditional F-tests with the Kenward-Roger approximation for the degrees of freedom as available in the R-package *pbkrtest* (Halekoh and Hojsgaard 2014). Tables were formatted with the assistance of the *sjPlot* package (Lüdtke, 2021; Nakagawa et al., 2017) and *ggplot2* (Wickham, 2016).

Abbreviations in the MLM tables are as follows:

difference (D)—difference between estimate and the reference (observe) value

samp—individual subjects

met—consecutive observations (1–5)

sex—biological sex (male, female)

apv.ref—reference value of APV

vpv.ref—reference value of VPV

ato.ref—reference value of ATO

vto.ref—reference value of VTO

CI—95% confidence intervals

p—significance of the F-test

df—degrees of freedom

Random effects

$\sigma^2$ —random variance estimate

$\tau_{00}$ —random intercept variance

$\tau_{11}$ —random slope variance

$\rho_{01}$ —random slope-intercept correlation

ICC—intraclass correlation coefficient (proportion of variance explained by a grouping (random) factor - subjects)

N—number of groups (subjects)

R<sup>2</sup>—coefficient of determination

## References

Bates D, Maechler M, Bolker B, Walker S (2015) Fitting linear mixed-effects models using *lme4*. J Statistical Software 67(1), 1–48. doi:10.18637/jss.v067.i01

Halekoh U, Hojsgaard S (2014) A Kenward-Roger approximation and parametric bootstrap methods for tests in linear mixed models: The R package *pbkrtest*. J Statistical Software 59(9), 1–30. URL <http://www.jstatsoft.org/v59/i09/>

Lüdtke D (2021) *sjplot*: Data visualization for statistics in social science. R package version 2.8.7. URL <https://CRAN.R-project.org/package=sjPlot>

Nakagawa S, Johnson P, Schielzeth H (2017) The coefficient of determination R<sup>2</sup> and intra-class correlation coefficient from generalized linear mixed-effects models revisited and expanded. J Roy Soc, Interface 14. doi:10.1098/rsif.2017.0213

Wickham H (2016) *ggplot2*: Elegant graphics for data analysis. Springer-Verlag, New York.

| <i>Predictors</i>                                    | <b>difference</b> |               |                |           |
|------------------------------------------------------|-------------------|---------------|----------------|-----------|
|                                                      | <i>Estimates</i>  | <i>CI</i>     | <i>p</i>       | <i>df</i> |
| (Intercept)                                          | 5.34              | 4.44 – 6.23   | < <b>0.001</b> | 375.03    |
| samp                                                 | –0.28             | –0.45 – –0.12 | <b>0.001</b>   | 398.07    |
| met [SITAR]                                          | 0.86              | 0.42 – 1.30   | < <b>0.001</b> | 4000.00   |
| sex [m]                                              | –1.62             | –2.99 – –0.25 | <b>0.021</b>   | 375.03    |
| apv.ref                                              | –0.47             | –0.55 – –0.39 | < <b>0.001</b> | 375.03    |
| samp * met [SITAR]                                   | –0.03             | –0.13 – 0.07  | 0.521          | 4000.00   |
| samp * sex [m]                                       | 0.31              | 0.05 – 0.56   | <b>0.018</b>   | 398.07    |
| met [SITAR] * sex [m]                                | –0.67             | –1.36 – 0.01  | 0.053          | 4000.00   |
| samp * apv.ref                                       | 0.03              | 0.01 – 0.04   | < <b>0.001</b> | 398.07    |
| met [SITAR] * apv.ref                                | –0.07             | –0.10 – –0.03 | <b>0.001</b>   | 4000.00   |
| sex [m] * apv.ref                                    | 0.18              | 0.07 – 0.29   | <b>0.001</b>   | 375.03    |
| (samp * met [SITAR]) * sex [m]                       | –0.09             | –0.24 – 0.06  | 0.239          | 4000.00   |
| (samp * met [SITAR]) * apv.ref                       | 0.00              | –0.01 – 0.01  | 0.785          | 4000.00   |
| (samp * sex [m]) * apv.ref                           | –0.03             | –0.05 – –0.01 | <b>0.010</b>   | 398.07    |
| (met [SITAR] * sex [m]) * apv.ref                    | 0.06              | 0.01 – 0.12   | <b>0.022</b>   | 4000.00   |
| (samp * met [SITAR] * sex[m]) * apv.ref              | 0.01              | –0.01 – 0.02  | 0.400          | 4000.00   |
| <b>Random Effects</b>                                |                   |               |                |           |
| $\sigma^2$                                           | 0.04              |               |                |           |
| $\tau_{00}$ ID                                       | 0.18              |               |                |           |
| $\tau_{11}$ ID.samp                                  | 0.01              |               |                |           |
| $\rho_{01}$ ID                                       | –0.90             |               |                |           |
| ICC                                                  | 0.64              |               |                |           |
| N ID                                                 | 334               |               |                |           |
| Observations                                         | 4676              |               |                |           |
| Marginal R <sup>2</sup> / Conditional R <sup>2</sup> | 0.504 / 0.820     |               |                |           |

| <i>Predictors</i>                                    | <b>difference</b> |               |                  |           |
|------------------------------------------------------|-------------------|---------------|------------------|-----------|
|                                                      | <i>Estimates</i>  | <i>CI</i>     | <i>p</i>         | <i>df</i> |
| (Intercept)                                          | 3.62              | 2.83 – 4.41   | <b>&lt;0.001</b> | 609.69    |
| samp                                                 | 0.22              | 0.05 – 0.39   | <b>0.010</b>     | 662.84    |
| met [SITAR]                                          | 2.62              | 1.81 – 3.43   | <b>&lt;0.001</b> | 4000.00   |
| sex [m]                                              | –0.25             | –1.30 – 0.80  | 0.638            | 609.69    |
| vpv.ref                                              | –0.43             | –0.53 – –0.32 | <b>&lt;0.001</b> | 609.69    |
| samp * met [SITAR]                                   | –0.20             | –0.39 – –0.02 | <b>0.029</b>     | 4000.00   |
| samp * sex [m]                                       | 0.08              | –0.14 – 0.30  | 0.483            | 662.84    |
| met [SITAR] * sex [m]                                | 1.53              | 0.45 – 2.61   | <b>0.006</b>     | 4000.00   |
| samp * vpv.ref                                       | –0.04             | –0.06 – –0.01 | <b>0.001</b>     | 662.84    |
| met [SITAR] * vpv.ref                                | –0.35             | –0.45 – –0.24 | <b>&lt;0.001</b> | 4000.00   |
| sex [m] * vpv.ref                                    | 0.14              | 0.02 – 0.27   | <b>0.028</b>     | 609.69    |
| (samp * met [SITAR]) * sex [m]                       | –0.02             | –0.27 – 0.22  | 0.841            | 4000.00   |
| (samp * met [SITAR]) * vpv.ref                       | 0.03              | 0.00 – 0.05   | <b>0.020</b>     | 4000.00   |
| (samp * sex [m]) * vpv.ref                           | –0.01             | –0.03 – 0.02  | 0.603            | 662.84    |
| (met [SITAR] * sex [m]) * vpv.ref                    | –0.15             | –0.28 – –0.02 | <b>0.023</b>     | 4000.00   |
| (samp * met [SITAR] * sex[m]) * vpv.ref              | 0.01              | –0.02 – 0.04  | 0.688            | 4000.00   |
| <b>Random Effects</b>                                |                   |               |                  |           |
| $\sigma^2$                                           | 0.27              |               |                  |           |
| $\tau_{00}$ ID                                       | 0.16              |               |                  |           |
| $\tau_{11}$ ID.samp                                  | 0.01              |               |                  |           |
| $\rho_{01}$ ID                                       | –0.97             |               |                  |           |
| ICC                                                  | 0.13              |               |                  |           |
| N ID                                                 | 334               |               |                  |           |
| Observations                                         | 4676              |               |                  |           |
| Marginal R <sup>2</sup> / Conditional R <sup>2</sup> | 0.634 / 0.682     |               |                  |           |

| <i>Predictors</i>                                    | <b>difference</b> |               |                  |           |
|------------------------------------------------------|-------------------|---------------|------------------|-----------|
|                                                      | <i>Estimates</i>  | <i>CI</i>     | <i>p</i>         | <i>df</i> |
| (Intercept)                                          | 5.42              | 4.92 – 5.92   | <b>&lt;0.001</b> | 411.10    |
| samp                                                 | 0.14              | 0.04 – 0.24   | <b>0.006</b>     | 436.03    |
| met [SITAR]                                          | 0.85              | 0.53 – 1.17   | <b>&lt;0.001</b> | 4000.00   |
| sex [m]                                              | –0.55             | –1.33 – 0.23  | 0.168            | 411.10    |
| ato.ref                                              | –0.57             | –0.63 – –0.52 | <b>&lt;0.001</b> | 411.10    |
| samp * met [SITAR]                                   | –0.23             | –0.30 – –0.16 | <b>&lt;0.001</b> | 4000.00   |
| samp * sex [m]                                       | –0.04             | –0.20 – 0.11  | 0.596            | 436.03    |
| met [SITAR] * sex [m]                                | –0.58             | –1.09 – –0.08 | <b>0.023</b>     | 4000.00   |
| samp * ato.ref                                       | –0.01             | –0.02 – 0.00  | 0.087            | 436.03    |
| met [SITAR] * ato.ref                                | –0.09             | –0.13 – –0.06 | <b>&lt;0.001</b> | 4000.00   |
| sex [m] * ato.ref                                    | 0.13              | 0.05 – 0.21   | <b>0.001</b>     | 411.10    |
| (samp * met [SITAR]) * sex [m]                       | 0.21              | 0.09 – 0.32   | <b>&lt;0.001</b> | 4000.00   |
| (samp * met [SITAR]) * ato.ref                       | 0.02              | 0.02 – 0.03   | <b>&lt;0.001</b> | 4000.00   |
| (samp * sex [m]) * ato.ref                           | 0.01              | –0.01 – 0.02  | 0.506            | 436.03    |
| (met [SITAR] * sex [m]) * ato.ref                    | 0.05              | 0.00 – 0.11   | <b>0.038</b>     | 4000.00   |
| (samp * met [SITAR] * sex[m]) * ato.ref              | –0.03             | –0.04 – –0.02 | <b>&lt;0.001</b> | 4000.00   |
| <b>Random Effects</b>                                |                   |               |                  |           |
| $\sigma^2$                                           | 0.03              |               |                  |           |
| $\tau_{00}$ ID                                       | 0.09              |               |                  |           |
| $\tau_{11}$ ID.samp                                  | 0.00              |               |                  |           |
| $\rho_{01}$ ID                                       | –0.45             |               |                  |           |
| ICC                                                  | 0.74              |               |                  |           |
| N ID                                                 | 334               |               |                  |           |
| Observations                                         | 4676              |               |                  |           |
| Marginal R <sup>2</sup> / Conditional R <sup>2</sup> | 0.689 / 0.919     |               |                  |           |

| <i>Predictors</i>                                    | <b>difference</b> |               |          |           |
|------------------------------------------------------|-------------------|---------------|----------|-----------|
|                                                      | <i>Estimates</i>  | <i>CI</i>     | <i>p</i> | <i>df</i> |
| (Intercept)                                          | 0.19              | −0.13 – 0.50  | 0.240    | 432.72    |
| samp                                                 | 0.49              | 0.45 – 0.54   | <0.001   | 635.98    |
| met [SITAR]                                          | 3.23              | 3.00 – 3.45   | <0.001   | 4000.00   |
| sex [m]                                              | 0.97              | 0.50 – 1.43   | <0.001   | 432.72    |
| vto.ref                                              | 0.01              | −0.05 – 0.07  | 0.791    | 432.72    |
| samp * met [SITAR]                                   | −0.43             | −0.48 – −0.38 | <0.001   | 4000.00   |
| samp * sex [m]                                       | −0.21             | −0.28 – −0.14 | <0.001   | 635.98    |
| met [SITAR] * sex [m]                                | −1.11             | −1.44 – −0.77 | <0.001   | 4000.00   |
| samp * vto.ref                                       | −0.10             | −0.11 – −0.09 | <0.001   | 635.98    |
| met [SITAR] * vto.ref                                | −0.61             | −0.65 – −0.57 | <0.001   | 4000.00   |
| sex [m] * vto.ref                                    | −0.21             | −0.31 – −0.12 | <0.001   | 432.72    |
| (samp * met [SITAR]) * sex [m]                       | 0.21              | 0.14 – 0.29   | <0.001   | 4000.00   |
| (samp * met [SITAR]) * vto.ref                       | 0.09              | 0.08 – 0.10   | <0.001   | 4000.00   |
| (samp * sex [m]) * vto.ref                           | 0.04              | 0.02 – 0.05   | <0.001   | 635.98    |
| (met [SITAR] * sex [m]) * vto.ref                    | 0.19              | 0.12 – 0.25   | <0.001   | 4000.00   |
| (samp * met [SITAR] * sex[m]) * vto.ref              | −0.04             | −0.05 – −0.02 | <0.001   | 4000.00   |
| <b>Random Effects</b>                                |                   |               |          |           |
| $\sigma^2$                                           | 0.02              |               |          |           |
| $\tau_{00}$ ID                                       | 0.05              |               |          |           |
| $\tau_{11}$ ID.samp                                  | 0.00              |               |          |           |
| $\rho_{01}$ ID                                       | −0.33             |               |          |           |
| ICC                                                  | 0.67              |               |          |           |
| N ID                                                 | 334               |               |          |           |
| Observations                                         | 4676              |               |          |           |
| Marginal R <sup>2</sup> / Conditional R <sup>2</sup> | 0.644 / 0.881     |               |          |           |

|                      | numDF | denDF | F-value  | p-value           |
|----------------------|-------|-------|----------|-------------------|
| (Intercept)          | 1     | 4330  | 633.755  | <b>&lt;0.0001</b> |
| samp                 | 1     | 4330  | 70.842   | <b>&lt;0.0001</b> |
| met                  | 1     | 4330  | 5.469    | <b>0.02</b>       |
| sex                  | 1     | 330   | 33.383   | <b>&lt;0.0001</b> |
| vpv.ref              | 1     | 330   | 5345.838 | <b>&lt;0.0001</b> |
| samp:met             | 1     | 4330  | 42.93    | <b>&lt;0.0001</b> |
| samp:sex             | 1     | 4330  | 0.312    | 0.6               |
| met:sex              | 1     | 4330  | 19.939   | <b>&lt;0.0001</b> |
| samp:vpv.ref         | 1     | 4330  | 20.095   | <b>&lt;0.0001</b> |
| met:vpv.ref          | 1     | 4330  | 499.773  | <b>&lt;0.0001</b> |
| sex:vpv.ref          | 1     | 330   | 6.136    | <b>0.014</b>      |
| samp:met:sex         | 1     | 4330  | 25.96    | <b>&lt;0.0001</b> |
| samp:met:vpv.ref     | 1     | 4330  | 20.479   | <b>&lt;0.0001</b> |
| samp:sex:vpv.ref     | 1     | 4330  | 0.13     | 0.7               |
| met:sex:vpv.ref      | 1     | 4330  | 18.186   | <b>&lt;0.0001</b> |
| samp:met:sex:vpv.ref | 1     | 4330  | 0.161    | 0.7               |

**Table S11** Analysis of Variance of the Linear Mixed Effects model for differences (D) between estimates and references values of Peak Velocity (VPV) with effects of sample (*samp*, 1–7), sex (*sex*, males, females), estimation method (*met*, FPCA, SITAR), and reference VPV (*vpv.ref*, in cm per year), including all interactions.

|                      | numDF | denDF | F-value  | p-value           |
|----------------------|-------|-------|----------|-------------------|
| (Intercept)          | 1     | 4330  | 199.064  | <b>&lt;0.0001</b> |
| samp                 | 1     | 4330  | 151.1493 | <b>&lt;0.0001</b> |
| met                  | 1     | 4330  | 1018.19  | <b>&lt;0.0001</b> |
| sex                  | 1     | 330   | 0.002    | 0.96              |
| vto.ref              | 1     | 330   | 701.3529 | <b>&lt;0.0001</b> |
| samp:met             | 1     | 4330  | 52.1274  | <b>&lt;0.0001</b> |
| samp:sex             | 1     | 4330  | 7.3955   | <b>0.007</b>      |
| met:sex              | 1     | 4330  | 31.1382  | <b>&lt;0.0001</b> |
| samp:vto.ref         | 1     | 4330  | 297.9201 | <b>&lt;0.0001</b> |
| met:vto.ref          | 1     | 4330  | 1084.619 | <b>&lt;0.0001</b> |
| sex:vto.ref          | 1     | 330   | 2.2175   | 0.14              |
| samp:met:sex         | 1     | 4330  | 0.1006   | 0.75              |
| samp:met:vto.ref     | 1     | 4330  | 360.9978 | <b>&lt;0.0001</b> |
| samp:sex:vto.ref     | 1     | 4330  | 9.2265   | <b>0.002</b>      |
| met:sex:vto.ref      | 1     | 4330  | 7.868    | <b>0.0051</b>     |
| samp:met:sex:vto.ref | 1     | 4330  | 22.6918  | <b>&lt;0.0001</b> |

**Table S12** Analysis of Variance of the Linear Mixed Effects model for differences (D) between estimates and references values of Velocity at Take-off (VTO) with effects of sample (*samp*, 1–7), sex (*sex*, males, females), estimation method (*met*, FPCA, SITAR), and reference VTO (*vto.ref*, in cm per year), including all interactions.
